# Supplementary material for: MicroRNA-191 regulates oral squamous cell carcinoma cells growth by targeting PLCD1 via the Wnt/β-catenin signaling pathway
Source: Springer Nature journal article supplement (doi:10.1186/s12885-023-11113-9), 2023-07-17

Fig3F: The PLCD1 protein expression in OSCC tissues.

Control OSCC Control OSCC Control OSCC

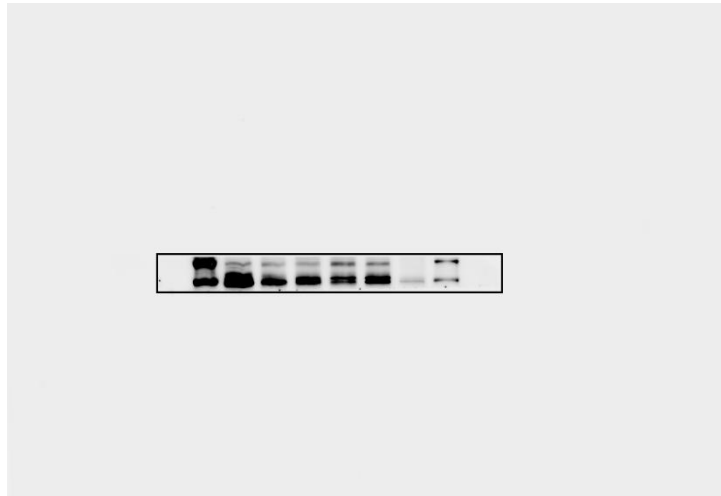

Fig3F: The GAPDH protein expression in OSCC tissues.

Control OSCC Control OSCC Control OSCC

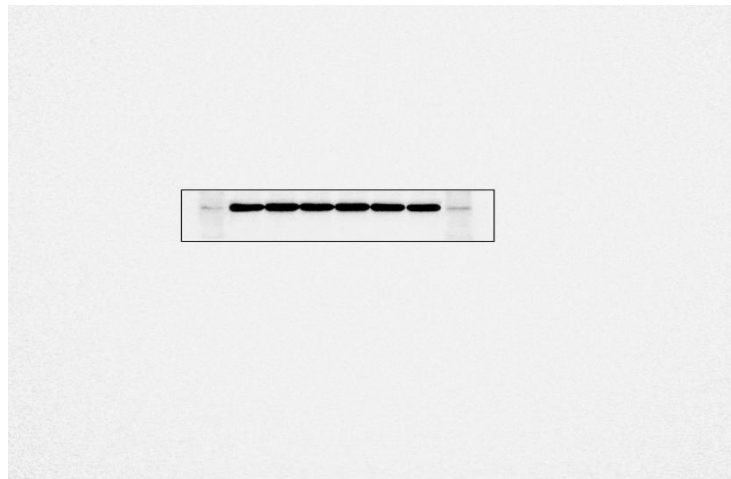

Fig3H: PLCD1 protein expression in CAL-27, SCC-9, and HOK cells.

HOK CAL-27 SCC-9

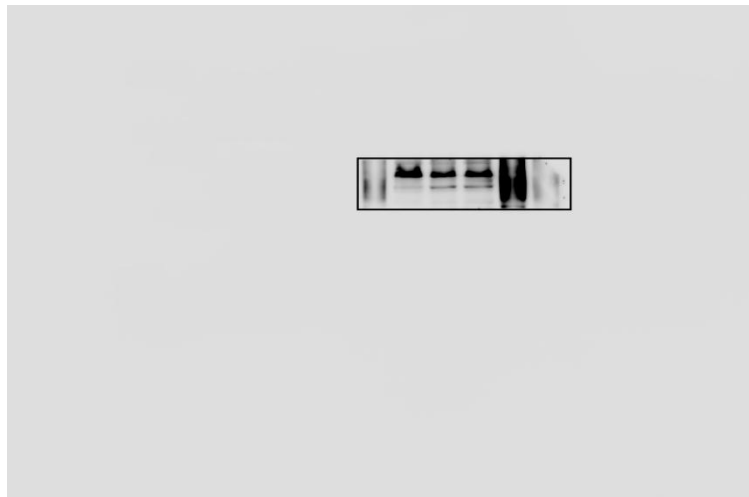

Fig3H: GAPDH protein expression in CAL-27, SCC-9, and HOK cells.

CAL-27 SCC-9 HOK

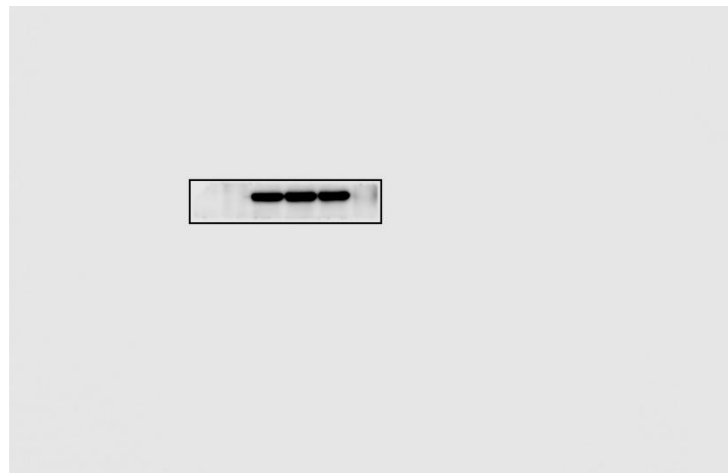

Fig5A: MiR-191 regulates the expression of  $\beta$ -catenin and the downstream genes of the  $\beta$ -catenin signaling pathway. Blank-control(C), miR-191mimics-NC(M-NC), miR-191mimics (M), miR-191inhibitor-NC(I-NC), miR-191 inhibitor (I)

CAL-27-  $\beta$ -catenin

C, M-NC, M, I-NC, I

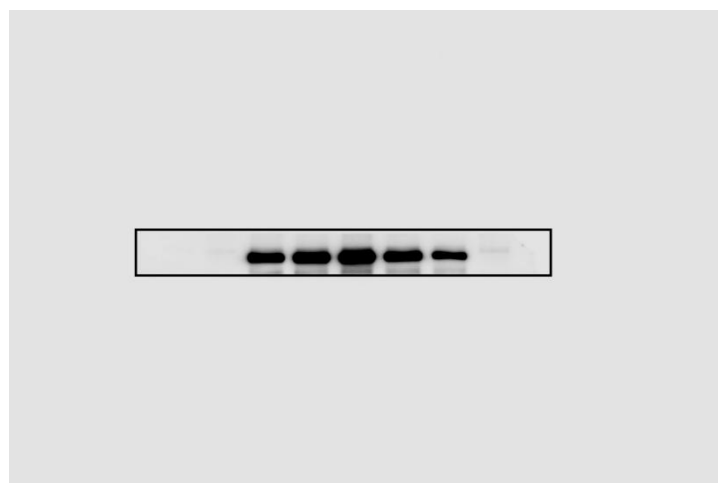

CAL-27-MMP-9

C, M-NC, M, I-NC, I

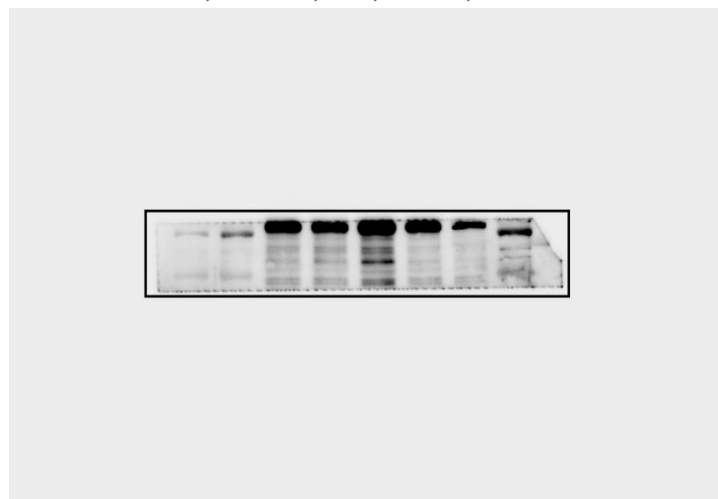

CAL-27-C-myc

C, M-NC, M, I-NC, I

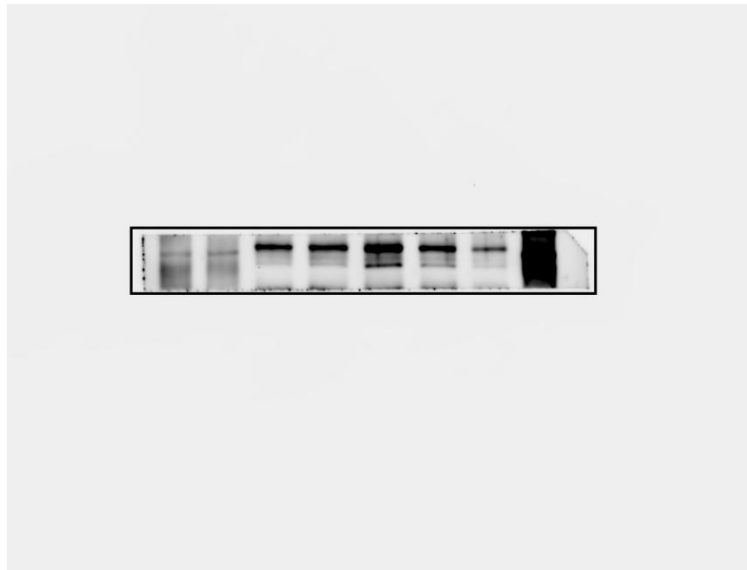

CAL-27--N -Cadherin

C, M-NC, M, I-NC, I

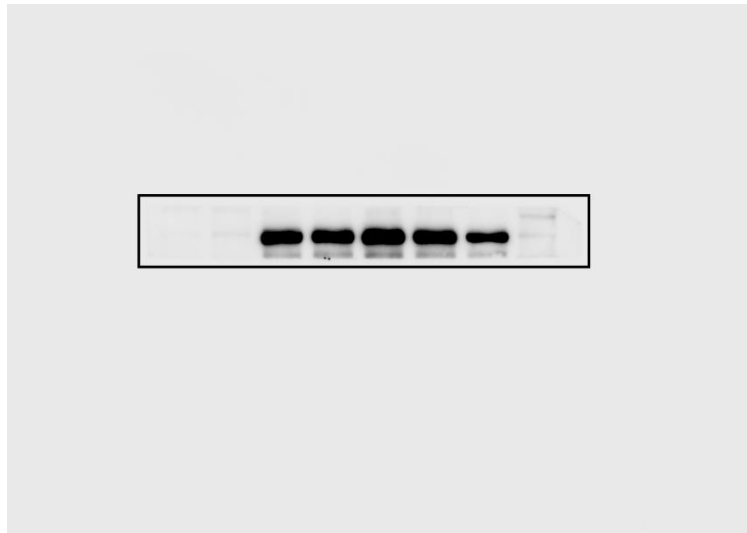

CAL-27-CDK4

C, M-NC, M, I-NC, I

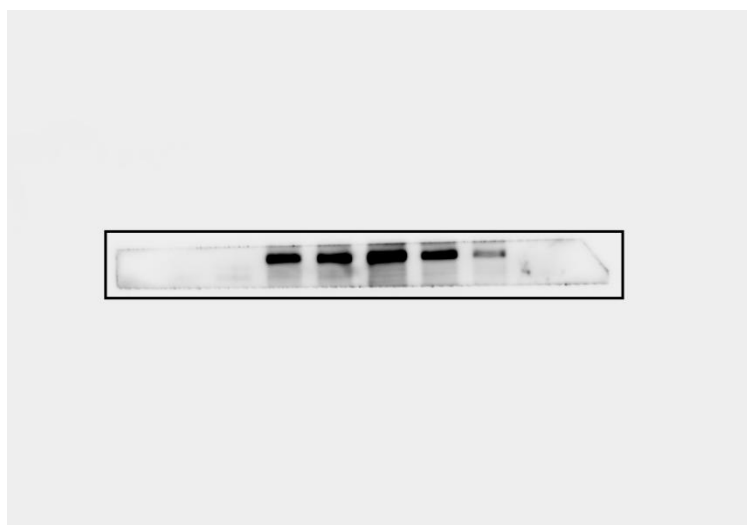

CAL-27-PCNA

C, M-NC, M, I-NC, I

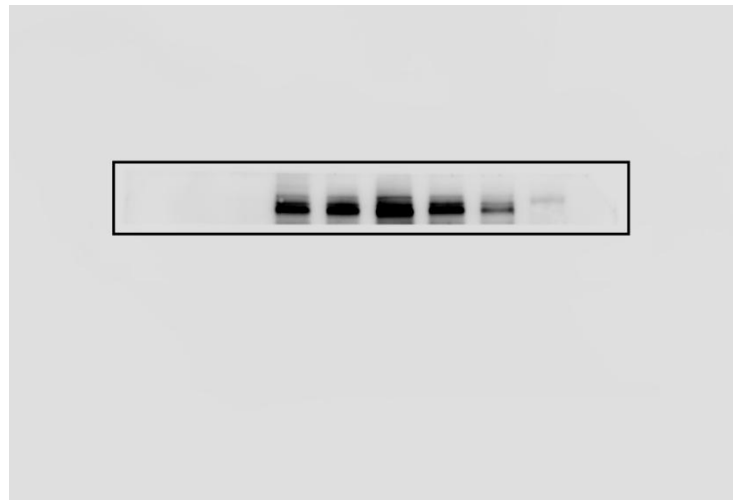

CAL-27-GAPDH

C, M-NC, M, I-NC, I

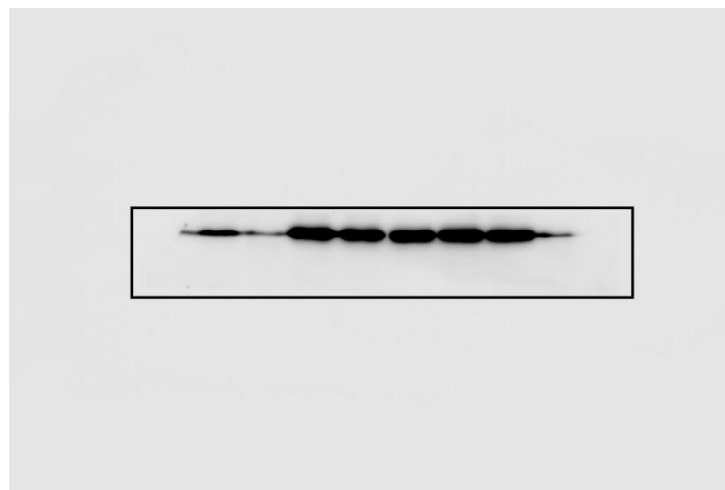

Fig5B: MiR-191 regulates the expression of  $\beta$ -catenin and the downstream genes of the  $\beta$ -catenin signaling pathway.

SCC-9- $\beta$ -catenin

C, M-NC, M, I-NC, I

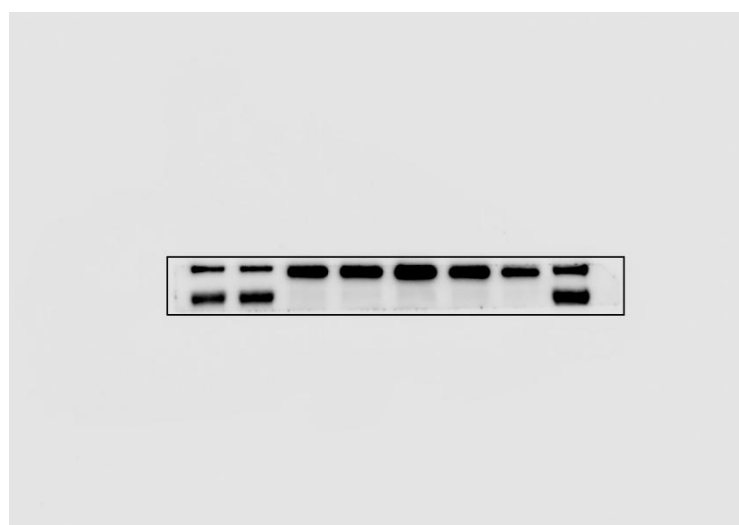

SCC-9-MMP-9

C, M-NC, M, I-NC, I

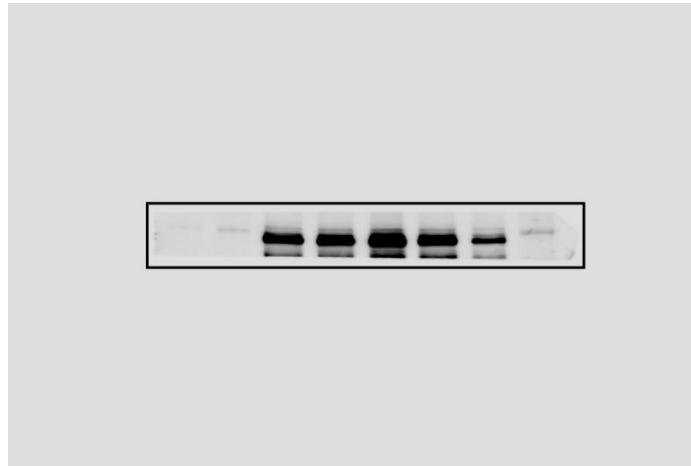

SCC-9-C-myc

C, M-NC, M, I-NC, I

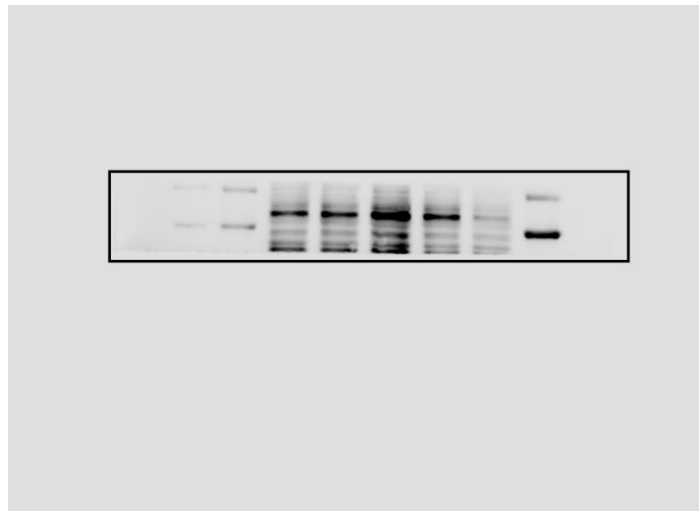

SCC-9-N-cadherin

C, M-NC, M, I-NC, I

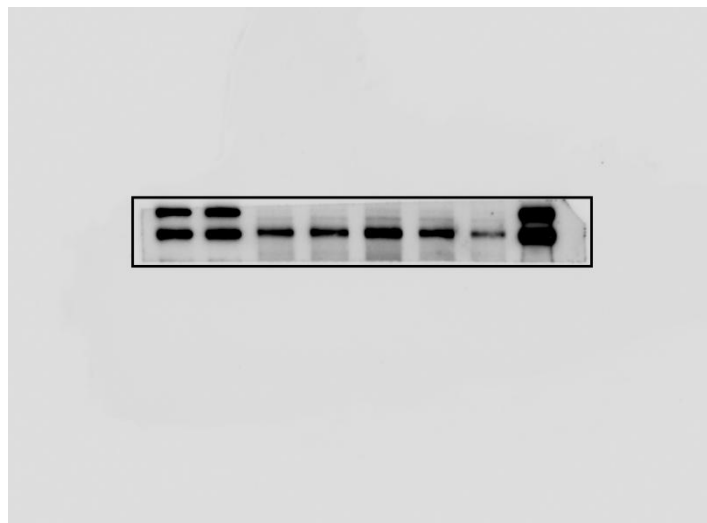

SCC-9- CDK4

C, M-NC, M, I-NC, I

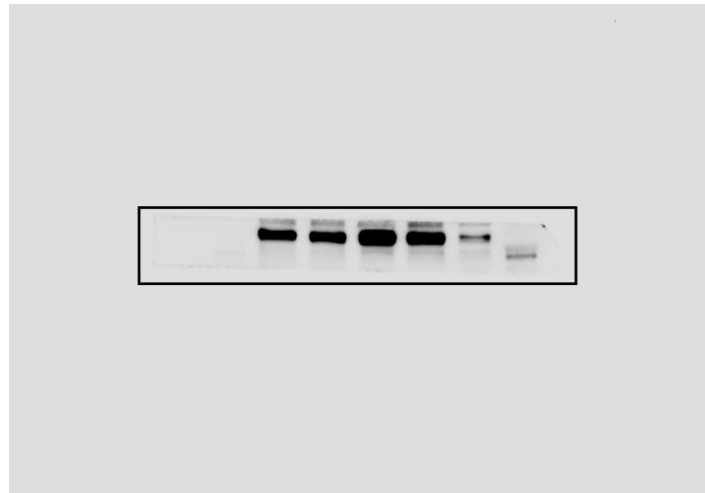

SCC-9-PCNA

C, M-NC, M, I-NC, I

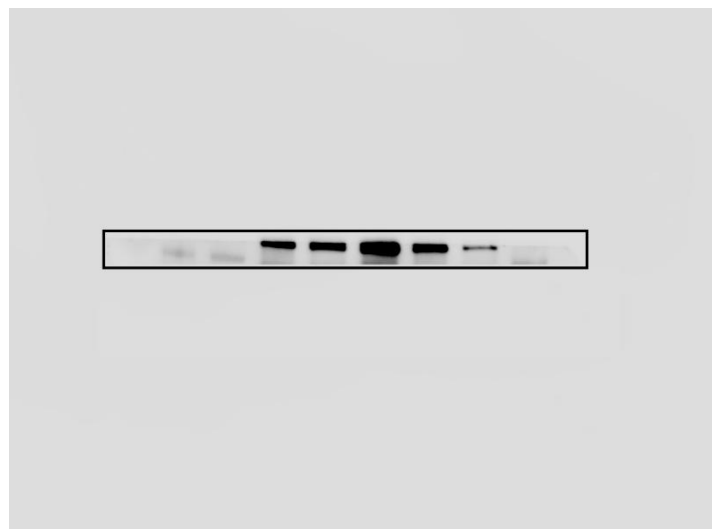

SCC-9-GAPDH

C, M-NC, M, I-NC, I

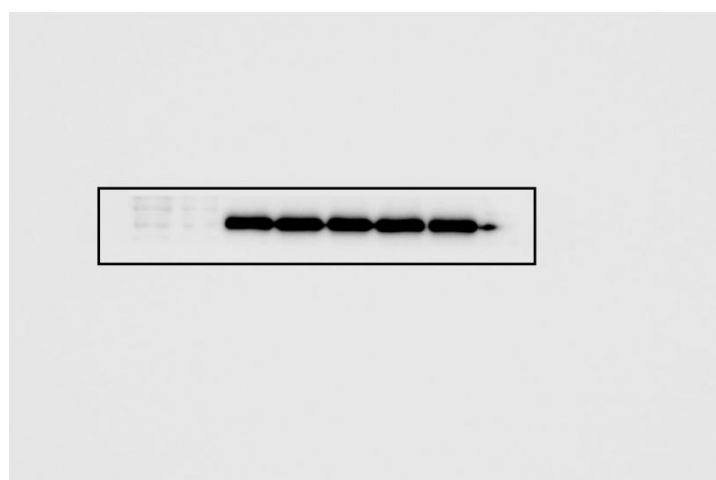

Fig5E: MiR-191 regulates the expression of  $\beta$ -catenin and the downstream genes of the  $\beta$ -catenin signaling pathway through targeting PLCD1. blank control (C) , miR-191 inhibitor+ siRNA-NC(I+si-NC), miR-191 inhibitor+siRNA-PLCD1( I+si-PLCD1)

CAL-27- $\beta$ -catenin

C I+si-NC I+si-PLCD1

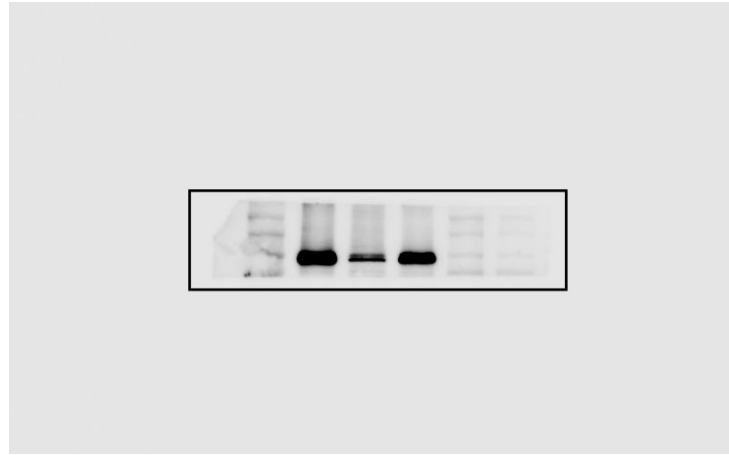

CAL-27-MMP9

C I+si-NC I+si-PLCD1

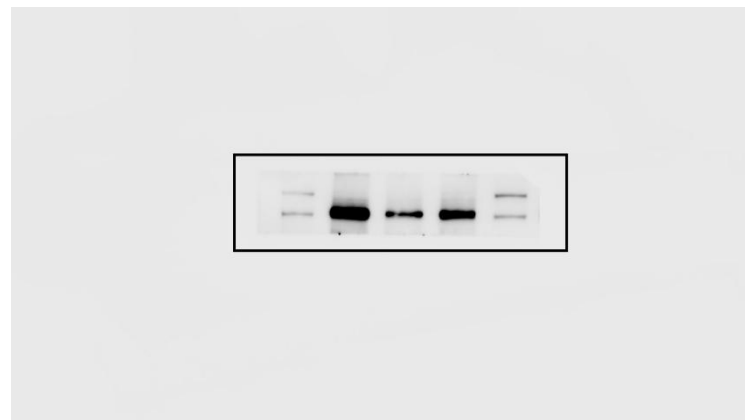

CAL-27-C-myc

C I+si-NC I+si-PLCD1

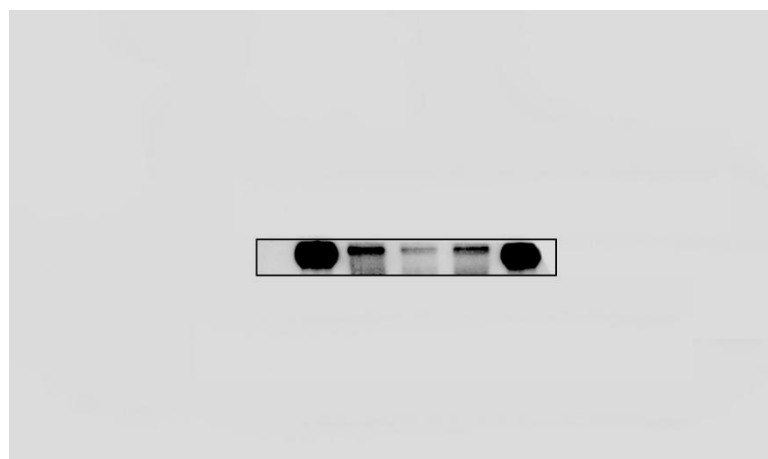

CAL-27-N-cadherin

C I+si-NC I+si-PLCD1

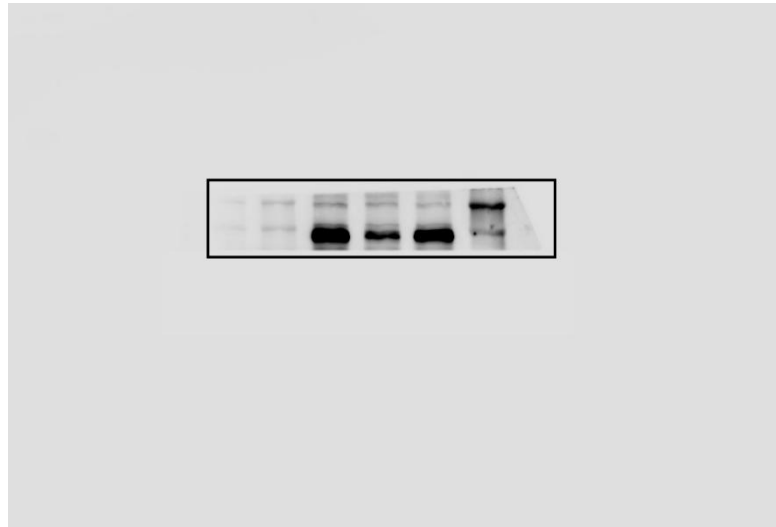

CAL-27- CDK4

C I+si-NC I+si-PLCD1

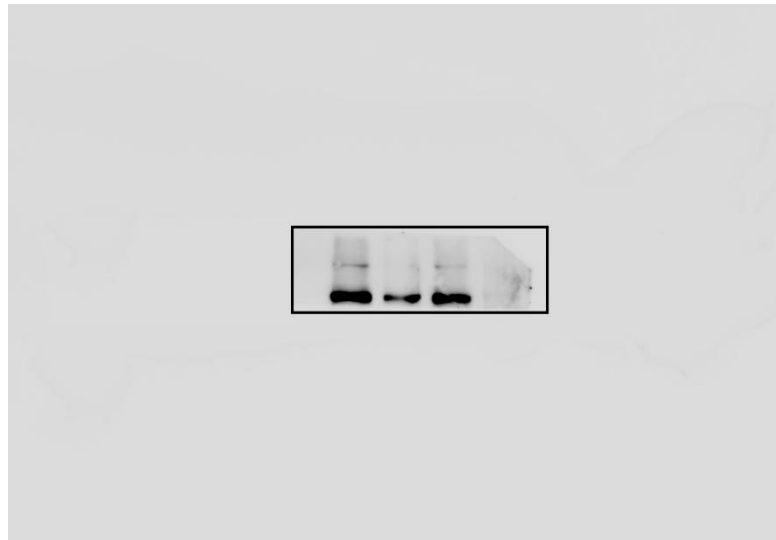

CAL-27- PCNA

C I+si-NC I+si-PLCD1

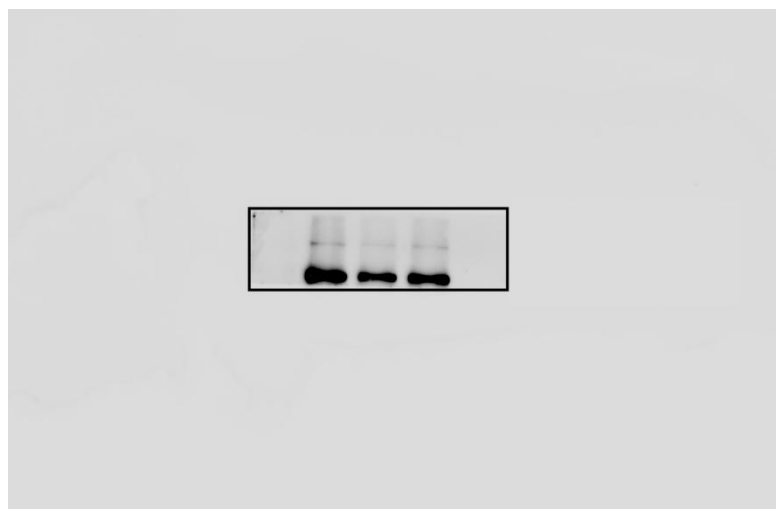



CAL-27-GAPDH

C I+si-NC I+si-PLCD1

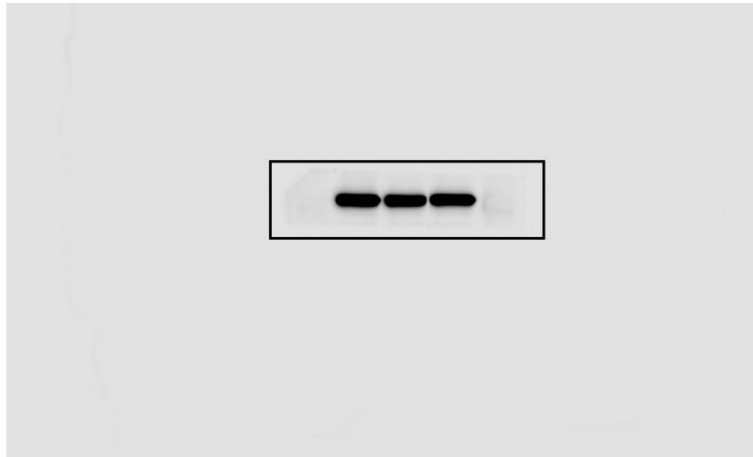

Fig5F: MiR-191 regulates the expression of  $\beta$ -catenin and the downstream genes of the  $\beta$ -catenin signaling pathway through targeting PLCD1. blank control (C) , miR-191 inhibitor+si-NC (I+si-NC), miR-191 inhibitor+si-PLCD1( I+si-PLCD1)

SCC-9- $\beta$ -catenin

C I+si-NC I+si-PLCD1

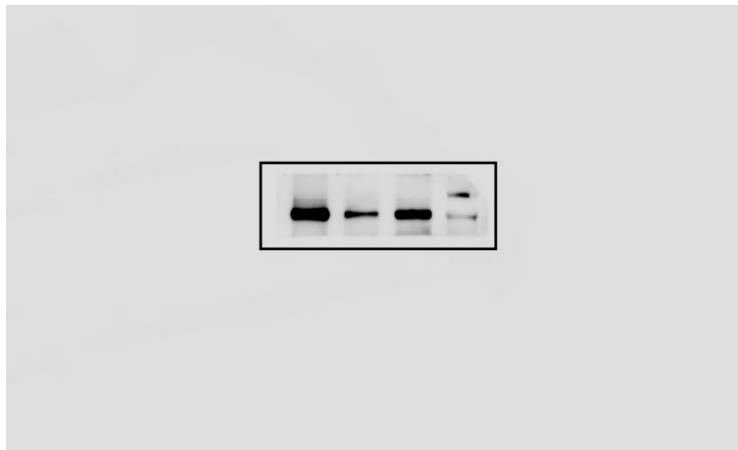

SCC-9-MMP9

C I+si-NC I+si-PLCD1

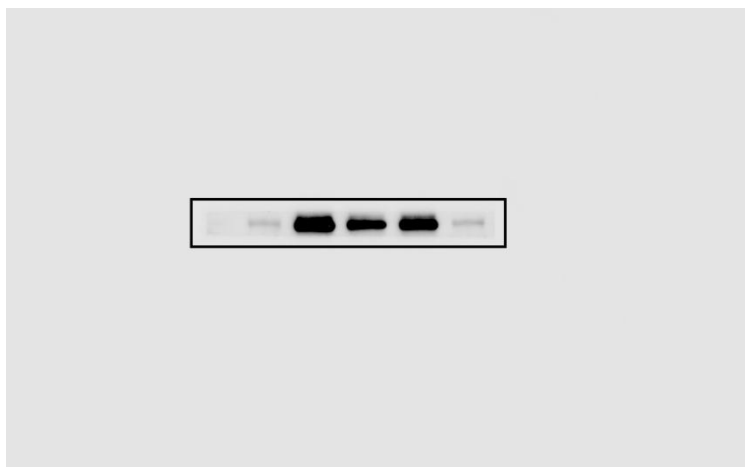

SCC-9-C-myc

C I+si-NC I+si-PLCD1

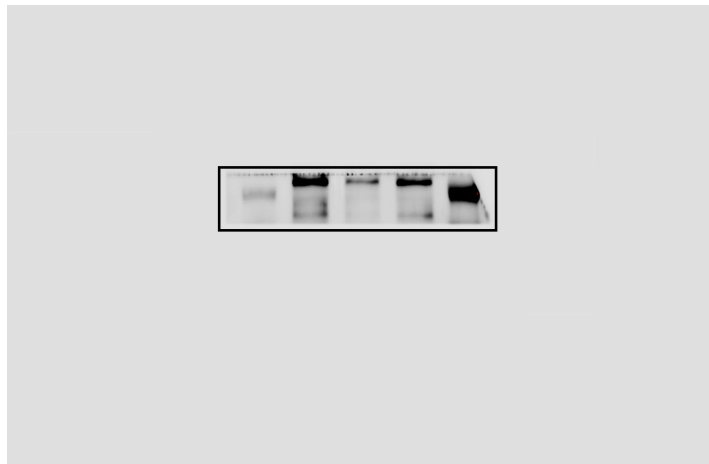

SCC-9-N-cadherin

C I+si-NC I+si-PLCD1

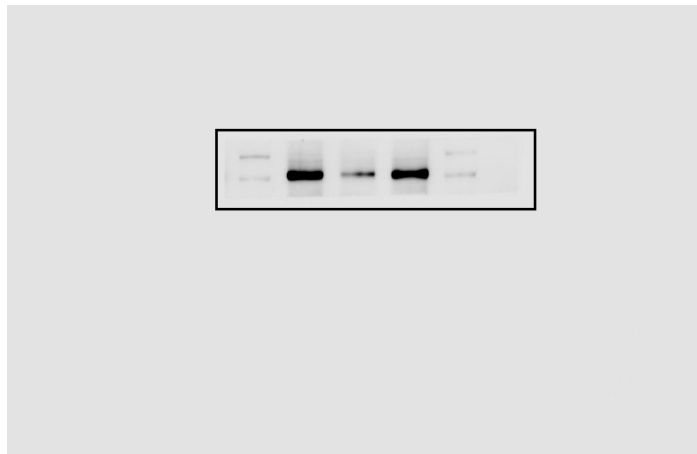

SCC-9-CDK4

C I+si-NC I+si-PLCD1

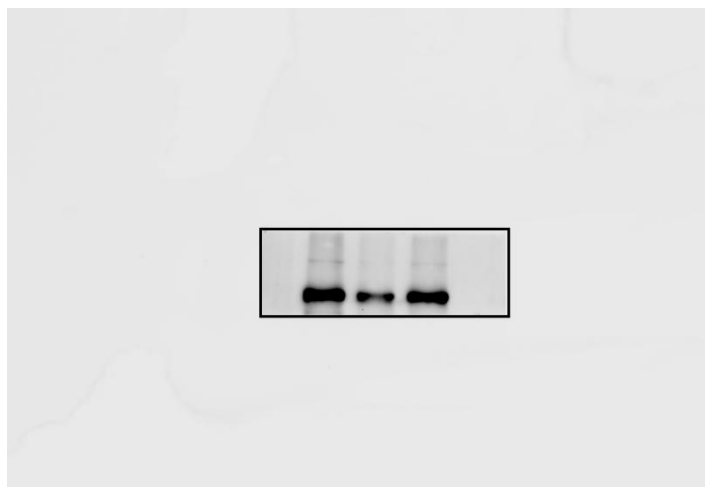

SCC-9-PCNA

C I+si-NC I+si-PLCD1

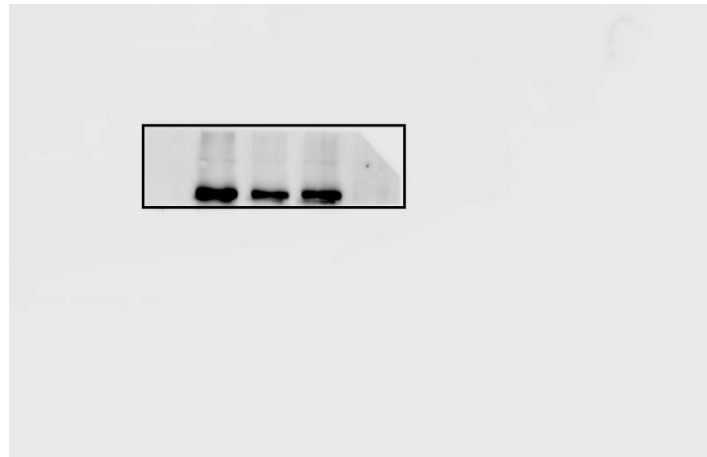

SCC-9-GAPDH

C I+si-NC I+si-PLCD1

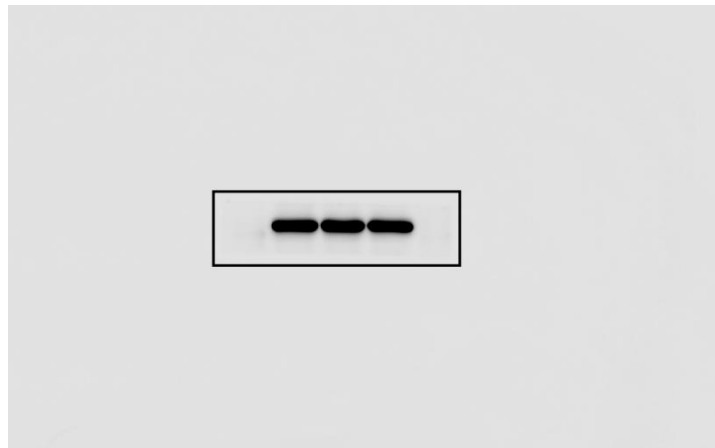

Supplement: MOESM1 [file 25809116]
